# Supplementary material for: A Cross-Sectional Study of Individuals Seeking Information on Transient Ischemic Attack and Stroke Symptoms Online: A Target for Intervention?
Source: PLOS journal article supplement (doi:10.1371/journal.pone.0047997), 2012-10-31
Supplement: S1 (10.1371/journal.pone.0047997.s001) [file journal.pone.0047997.s001]

|               |                             | Neurologist 1               |                             |                     |                     | Total     |
|---------------|-----------------------------|-----------------------------|-----------------------------|---------------------|---------------------|-----------|
|               |                             | Definitely not a Stroke/TIA | Unlikely to be a Stroke/TIA | Probable Stroke/TIA | Definite Stroke/TIA |           |
| Neurologist 2 | Definitely not a Stroke/TIA | 21                          | 13                          | 1                   | 0                   | <b>35</b> |
|               | Unlikely to be a Stroke/TIA | 3                           | 11                          | 2                   | 0                   | <b>16</b> |
|               | Probable Stroke/TIA         | 0                           | 1                           | 9                   | 1                   | <b>11</b> |
|               | Definite Stroke/TIA         | 0                           | 0                           | 8                   | 14                  | <b>22</b> |
|               | Total                       | <b>24</b>                   | <b>25</b>                   | <b>20</b>           | <b>15</b>           | <b>84</b> |
