# Supplementary material for: A Cross-Sectional Study of Individuals Seeking Information on Transient Ischemic Attack and Stroke Symptoms Online: A Target for Intervention?
Source: PLOS journal article supplement (doi:10.1371/journal.pone.0047997), 2012-10-31
Supplement: S2 (10.1371/journal.pone.0047997.s002) [file journal.pone.0047997.s002]

## **Text S1 - Internet Advertisements**

### Mini-Stroke Symptom Study

Learn about whether your symptoms could be from a mini-stroke or TIA.

[tia.ucsf.edu](http://tia.ucsf.edu)

### Possible Mini-Stroke/TIA?

Online research study to evaluate symptoms of TIA or mini-stroke

[tia.ucsf.edu](http://tia.ucsf.edu)
