# Supplementary material for: A Cross-Sectional Study of Individuals Seeking Information on Transient Ischemic Attack and Stroke Symptoms Online: A Target for Intervention?
Source: PLOS journal article supplement (doi:10.1371/journal.pone.0047997), 2012-10-31
Supplement: S3 (10.1371/journal.pone.0047997.s003) [file journal.pone.0047997.s003]

## Text S2 - Target Search Terms for Targeting Internet Advertisements

tias mini strokes  
tia mini stroke symptoms  
effects of mini strokes  
trans ischemic attacks  
symptoms of mini strokes  
symptoms of a mini stroke  
transient ischemic attack mini  
stroke  
mini stroke symptoms  
what causes a mini stroke  
signs of mini stroke  
signs of mini strokes  
signs of a minor stroke  
mini stroke symptom  
mini stroke signs  
signs of a mini stroke  
transient ischemic attack  
stroke  
mini stroke causes  
symptoms of small stroke  
symptoms of a tia stroke  
mini strokes symptoms  
mini stroke  
symptoms of transient  
ischemic attack  
mini stroke signs and  
symptoms  
symptom of a stroke  
signs and symptoms of stroke  
in women  
what are symptoms of a  
stroke  
symptoms of mini stroke  
the symptoms of a stroke  
signs of strokes  
tia strokes causes  
symptoms of mild stroke  
trans ischemic attack  
symptoms of having a stroke  
symptoms of tia stroke  
signs before a stroke  
tia stroke

symptoms of tia  
early stroke symptoms  
transient ischemic  
ischemic attack symptoms  
stroke symptoms in women  
signs of a mild stroke  
symptom of stroke  
signs of an impending stroke  
5 signs of a stroke  
stroke symptoms warning  
signs  
transient attack  
mini stroke treatment  
tia stroke symptoms  
what causes mini strokes  
sign of a stroke  
ischemic attack  
tias symptoms  
mild stroke symptoms  
signs of a stroke  
symptoms stroke  
causes of mini strokes  
what is a tia  
mini stroke in women  
what are the symptoms of  
stroke  
signs of impending stroke  
what are symptoms of stroke  
symptoms for a stroke  
sign of strokes  
early signs of a stroke  
sign of stroke  
transient ischemic attacks  
symptoms  
signs of a tia stroke  
what are stroke symptoms  
small strokes symptoms  
mini strokes in women  
warning signs of stroke  
small stroke symptoms  
mini strokes  
symptoms for stroke

warning signs of a stroke  
mini stroke symptoms in men  
signs of mild stroke  
common stroke symptoms  
symptoms before a stroke  
mini stroke stroke  
sign of stroke in women  
mini strokes in elderly  
signs of mini stroke in  
women  
causes of a stroke  
pre stroke symptoms  
what is transient ischemic  
attack  
symptoms of a mild stroke  
signs for stroke  
transient ischemic attack  
symptoms  
symptoms of stroke in men  
stroke like symptoms  
symptoms of stroke in  
women  
having a stroke  
early symptoms of a stroke  
transient ischemic attacks  
signs stroke  
symptoms of a minor stroke  
the symptoms of stroke  
symptoms of mini stroke in  
women  
signs symptoms of a stroke  
signs of stroke in women  
early warning signs of stroke  
signs and symptoms of a  
stroke  
signs of stroke  
strokes symptoms  
symptoms of a stroke in  
women  
am i having a stroke  
early symptoms of stroke  
symptoms of a stroke

symptoms of strokes  
3 signs of a stroke  
what are signs of stroke  
stroke warning signs  
women stroke symptoms  
what is a transient ischemic  
attack  
what are the symptoms of a  
stroke  
symptoms of a mini stroke in  
women  
what is a stroke  
early signs of stroke  
signs of having a stroke  
signs symptoms stroke  
mini stroke symptoms for  
women  
stroke signs and symptoms

symptoms of stroke  
signs of a stroke in a woman  
pre stroke signs  
cva symptoms  
transient ischemic attack tia  
sign and symptoms of stroke  
signs and symptoms of stroke  
ischemic stroke symptoms  
symptoms before stroke  
warning signs of stroke in  
women  
symptoms of strokes in  
women  
mini stroke diagnosis  
signs of a small stroke  
4 signs of a stroke  
signs your having a stroke  
symptoms of ischemic stroke

cause of a stroke  
mild stroke symptoms for  
women  
signs and symptoms of a  
stroke in women  
stroke symptoms and  
treatment  
symptom of stroke in women  
symptoms of a small stroke  
transient ischemic stroke  
symptoms  
what are the signs and  
symptoms of a stroke  
five signs of stroke  
5 warning signs of stroke  
causes of stroke in women
