# Supplementary material for: A Cross-Sectional Study of Individuals Seeking Information on Transient Ischemic Attack and Stroke Symptoms Online: A Target for Intervention?
Source: PLOS journal article supplement (doi:10.1371/journal.pone.0047997), 2012-10-31
Supplement: S4 (10.1371/journal.pone.0047997.s004) [file journal.pone.0047997.s004]

## Text S3 - Questionnaire

PLEASE ANSWER THESE QUESTIONS AS BEST AS YOU CAN.

1. How old are you? (in years)

2. What is your gender?

- Male  
 Female

**3. The following questions are about medical problems that you were diagnosed with in the past, before you developed TIA or mini-stroke symptoms.**

3a. Have you *ever* been told by a doctor or nurse that you had diabetes (sugar diabetes)?

- Yes  
 No

3b. Are you *currently* taking medicine for diabetes (sugar diabetes)?

- Yes  
 No

3c. Have you *ever* been told by a doctor or nurse that you had high blood pressure (hypertension)?

- Yes  
 No

3d. Are you *currently* taking medicine for high blood pressure (hypertension)?

- Yes  
 No

3e. Have you ever been told by a doctor or nurse that you had a stroke in the past (not including this most recent episode)?

- Yes  
 No

3f. Have you *ever* been told by a doctor or nurse that you had a mini-stroke, TIA, or transient ischemic attack in the past (**not** including this most recent episode)?

- Yes  
 No

3g. Has a doctor or nurse *ever* told you that you have migraines?

- Yes  
 No

**4. The following questions are about the specific episode of symptoms that are concerning for mini-stroke or TIA episode. If you have had multiple episodes of symptoms in the past, choose the most recent episode of symptoms that is the most concerning to you.**

4a. How long ago did these symptoms occur?

- Within the last 24 hours
- Within the last 48 hours
- Within the last week
- Within the last month
- Within the last six months

4b. How long did your symptoms last?

- Less than 10 minutes
- 10-59 minutes
- 60 minutes or more

4c. How many times has this same set of symptoms occurred in the last 12 months?

- only once
- twice
- 3 to 5 times
- 6 to 10 times
- 11 or more times

4d. Were your symptoms at their worst within seconds of onset?

- Yes
- No

4e. Did your symptoms gradually worsen over minutes to hours?

- Yes
- No

4f. How did your symptoms start?

- Yes
- No

4g. Did you **suddenly** have weakness on only one side of your body?

- Yes
- No

4h. Did you have trouble moving your arms or legs?

- Yes
- No

4i. Did you have any warning that an episode was about to occur?

- Yes
- No

4j. Did you **suddenly** lose the ability to express yourself verbally or in writing?

- Yes
- No

4k. Did you **suddenly** lose the ability to understand what people were saying?

- Yes
- No

4l. Did you have slurred speech during the episode?

- Yes
- No

4m. Did you have trouble speaking during the episode?

- Yes
- No

4n. Did you have **sudden** numbness on only one side of your body?

- Yes
- No

4o. Did you develop a headache right before, during, or right after the episode?

- Yes
- No

4p. Did you have any of the following during the episode (Check all that apply)

- Sudden weakness
- Sudden numbness
- Sudden double vision
- Sudden trouble speaking
- Sudden trouble understanding
- None of the above.

4q. Have you already sought medical advice about this episode?

- Yes
- No
